# Supplementary material for: Effectiveness of a monovalent rotavirus vaccine in infants in Malawi after programmatic roll-out: an observational and case-control study
Source: PubMed Central journal article supplement (PMC4374102; doi:10.1016/s1473-3099(14)71060-6), 2015-04

## Supplementary webappendix

This webappendix formed part of the original submission and has been peer reviewed. We post it as supplied by the authors.

Supplement to: Bar-Zeev N, Kapanda L, Tate JE, et al. Effectiveness of a monovalent rotavirus vaccine in infants in Malawi after programmatic roll-out: an observational and case-control study. *Lancet Infect Dis* 2015; published online Jan 29. [http://dx.doi.org/10.1016/S1473-3099\(14\)71060-6](http://dx.doi.org/10.1016/S1473-3099(14)71060-6).

**Web Extra Table 1. Definitions**

|                                  |                                                                                                                                                                                                                                                                                                                                                                                                                                                                                                                         |
|----------------------------------|-------------------------------------------------------------------------------------------------------------------------------------------------------------------------------------------------------------------------------------------------------------------------------------------------------------------------------------------------------------------------------------------------------------------------------------------------------------------------------------------------------------------------|
| Gastroenteritis/Diarrhoea        | Passage of stools of a less formed character than usual for that child occurring in 3 or more episodes within 24 hours.                                                                                                                                                                                                                                                                                                                                                                                                 |
| Rotavirus confirmed case         | Vaccine age-eligible child presenting to QECH with diarrhoea and stool has positive rotavirus result on ELISA.                                                                                                                                                                                                                                                                                                                                                                                                          |
| Test-negative                    | Vaccine age-eligible child presenting to QECH with diarrhoea and stool has negative rotavirus result on ELISA.                                                                                                                                                                                                                                                                                                                                                                                                          |
| Hospital admission               | Children staying overnight in hospital, or children requiring observation of >4 hours in hospital short stay unit.                                                                                                                                                                                                                                                                                                                                                                                                      |
| Vaccine age-eligible             | Born on or after 17 September 2012 – age less than 6 weeks on date of vaccine introduction on 29 October 2012.                                                                                                                                                                                                                                                                                                                                                                                                          |
| HIV-exposed                      | Any child born to an HIV-infected mother, or an infant <12 months old with a positive antibody test and absent HIV DNA PCR result or negative result in any infant still breastfeeding.                                                                                                                                                                                                                                                                                                                                 |
| HIV-infected                     | Infant <12 months with positive HIV DNA PCR, or child 12 months or older with two sequential positive rapid antibody tests.                                                                                                                                                                                                                                                                                                                                                                                             |
| Dehydration (for Vesikari score) | None: Absence of any clinical sign of dehydration on admission.<br>Mild-Moderate: Presence on admission of two or more of: <ul style="list-style-type: none"><li>• Restless or irritable</li><li>• Sunken eyes</li><li>• Thirsty or drinking eagerly</li><li>• Slow skin pinch</li></ul> Severe: Presence on admission of two or more of: <ul style="list-style-type: none"><li>• Lethargic or unconscious</li><li>• Sunken eyes</li><li>• Drinks poorly or is unable to drink</li><li>• Very slow skin pinch</li></ul> |

QECH = Queen Elizabeth Central Hospital

ELISA = Enzyme-linked immunosorbent assay

HIV DNA PCR = Human Immunodeficiency Virus deoxyribonucleic acid polymerase chain reaction

---

**Web Extra Table 2. Inclusion and exclusion criteria**

---

|                    |                                                                                                                                                                                                                                                                                                                                                                                                                                                                                                                                                                                                                                                                                                                                                                                                                                                                                                                                                                                                                       |
|--------------------|-----------------------------------------------------------------------------------------------------------------------------------------------------------------------------------------------------------------------------------------------------------------------------------------------------------------------------------------------------------------------------------------------------------------------------------------------------------------------------------------------------------------------------------------------------------------------------------------------------------------------------------------------------------------------------------------------------------------------------------------------------------------------------------------------------------------------------------------------------------------------------------------------------------------------------------------------------------------------------------------------------------------------|
| Inclusion criteria | Case-patients were eligible for enrolment in the surveillance program if they met <i>all</i> of the following criteria: <ol style="list-style-type: none"><li>1. Are &lt;5 years of age.</li><li>2. Live in Blantyre district.</li><li>3. Present to QECH with diarrhoea on or after the study start date</li><li>4. Clinical illness should not be explained by an alternative underlying medical condition.</li><li>5. Clinical illness commenced within 14 days prior to hospital visit; and</li><li>6. Are either:<ol style="list-style-type: none"><li>a. Seen at QECH and treated with rehydration (oral or intravenous) for diarrhoea and discharged home; or</li><li>b. Admitted to the hospital and treated for diarrhoea.</li></ol></li><li>7. Eligible to have received at least one dose of vaccine prior to illness (i.e. age 8 weeks or older and following date of vaccine introduction).</li><li>8. Produce a rotavirus positive stool sample during the first 48 hours after presentation.</li></ol> |
| Exclusion criteria | Case-patients were excluded from enrolment in the active surveillance program if <i>any</i> of the following applied: <ol style="list-style-type: none"><li>1. Unable to contact parent or guardian to obtain informed consent.</li><li>2. Admitted to another hospital for &gt;24 hours (and subsequently transferred to QECH).</li><li>3. Re-presentation within 14 days of previous hospital separation for the same illness.</li><li>4. Hospital admission &gt;48 hours prior to enrolment.</li><li>5. Known oncological diagnosis or congenital immunodeficiency (apart from HIV infection).</li><li>6. Enrolled prior to vaccine introduction.</li><li>7. Age-ineligible to have received vaccine.</li></ol>                                                                                                                                                                                                                                                                                                    |

---

QECH = Queen Elizabeth Central Hospital

**Web Extra Table 3. Demographic and clinical characteristics of children younger than 5 years presenting to Queen Elizabeth Central Hospital, Blantyre Malawi by case status, enrolled 1 January 2012 – 30 June 2014**

|                                    | Rotavirus Positive<br>N=508 (%) | Rotavirus Negative<br>N=933 (%) | P-value             |
|------------------------------------|---------------------------------|---------------------------------|---------------------|
| Median age in months (range)       | 10•0 (0•5–41•9)                 | 10•8 (0•4–58•9)                 | <0•001 <sup>a</sup> |
| Median household size (range)      | 4 (2–12)                        | 4 (2–15)                        | 0•22 <sup>a</sup>   |
| Median maternal age (range)        | 25 (15–54)                      | 25 (16–42)                      | 0•64 <sup>a</sup>   |
| Maternal orphan                    | 5 (1%)                          | 16 (2%)                         | 0•27                |
| Paternal orphan                    | 5 (1%)                          | 15 (2%)                         | 0•34                |
| Preterm birth (<37 weeks)          | 13 (2•6%)                       | 46 (5%)                         | 0•81                |
| Median birth weight (kg) (range)   | 3 (1•5–5•5)                     | 3 (1•1–5•0)                     | 0•03                |
| HIV exposed                        | 82 (17%)                        | 175 (19%)                       | 0•44                |
| HIV infected                       | 20 (5%)                         | 59 (8%)                         | 0•05                |
| Currently breast fed               | 456 (91%)                       | 729 (79%)                       | <0•001*             |
| Exclusively breast fed             | 38 (8%)                         | 45 (6%)                         | 0•17                |
| Mean weight for age Z-score (SD) † | -1•2 (1•3)                      | -1•6 (1•6)                      | <0•001              |
| Mean length for age Z-score (SD)   | -0•7 (2•6)                      | -0•6(3•1)                       | 0•66                |
| Diarrhoea                          | 508 (100%)                      | 933 (100%)                      |                     |
| Admitted inpatient                 | 465 (92%)                       | 844 (90%)                       | 0•50                |
| Vesikari Score                     |                                 |                                 | <0•001 <sup>b</sup> |
| ≤10                                | 98 (19%)                        | 317 (34%)                       |                     |
| 10-14                              | 301 (59%)                       | 461 (47%)                       |                     |
| ≥15                                | 109 (21%)                       | 153 (16%)                       |                     |
| Mean (SD)                          | 12•0 (3•4)                      | 11•2 (3•4)                      | <0•001              |
| Verified Vaccination Status        | 459 (91%)                       | 795 (85%)                       | 0•006*              |

**a** Wilcoxon Rank Sum test, **b** Mantel-Haenszel  $\chi^2$  test, SD= Standard Deviation

\* Association lost once adjusted for age

† Anthropometry at presentation to hospital

Web Extra Figure 1. Recruitment flow diagram of children presenting with diarrhoea to Queen Elizabeth Central Hospital, 1 January 2012 to 30 June 2014.

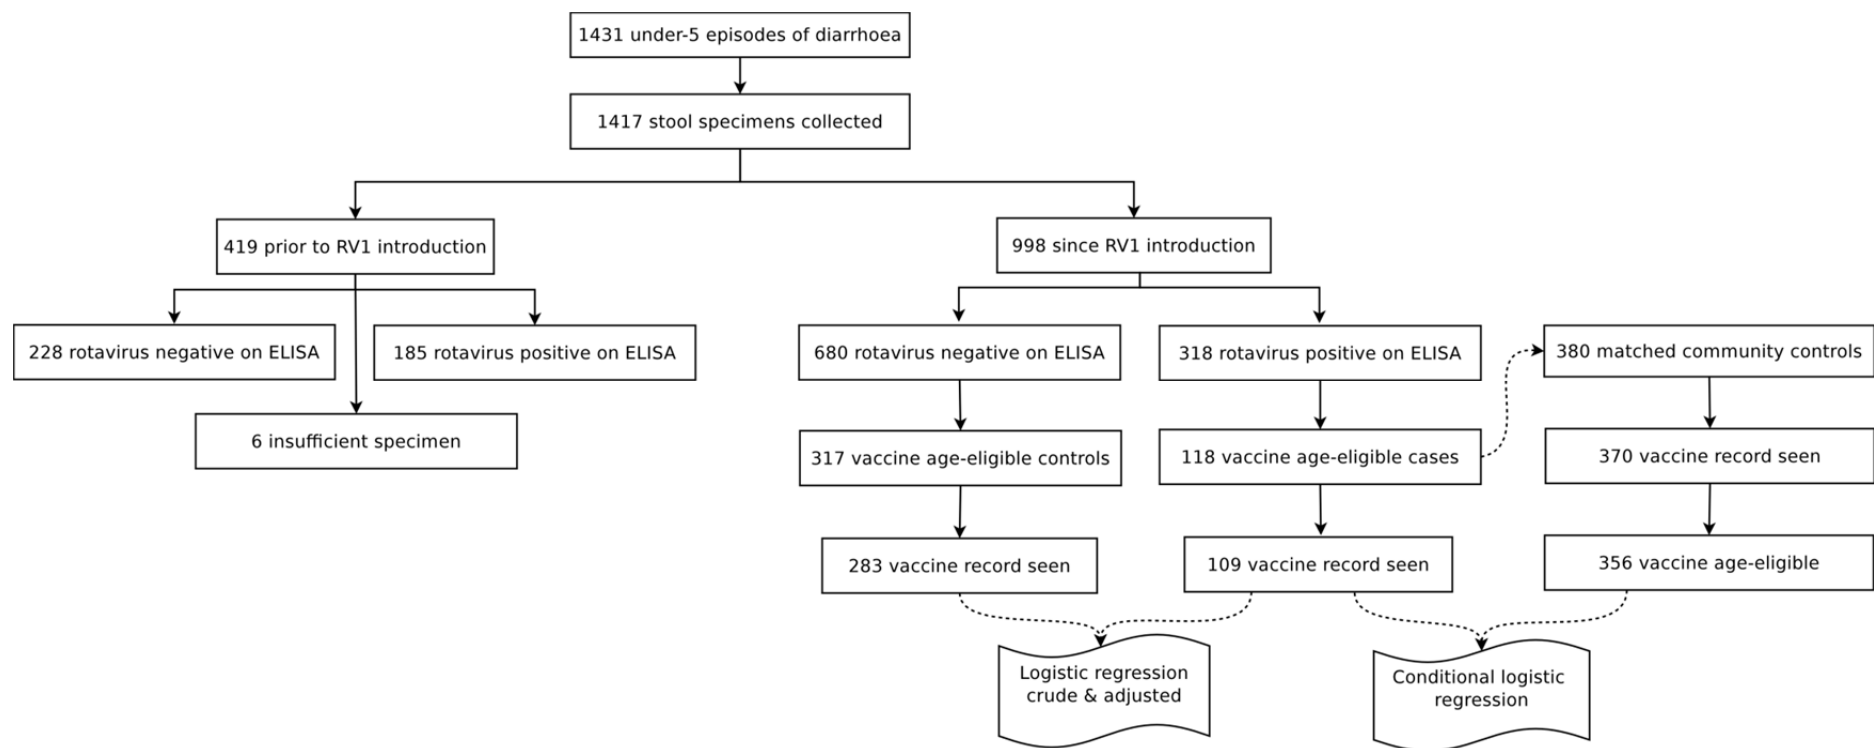

**Web Extra Figure 2. Age distribution of children <5years with rotavirus confirmed diarrhoea before vaccine introduction (1 January 2012 to 28 October 2012) and after vaccine introduction (29 October 2012 to 30 June 2014).**

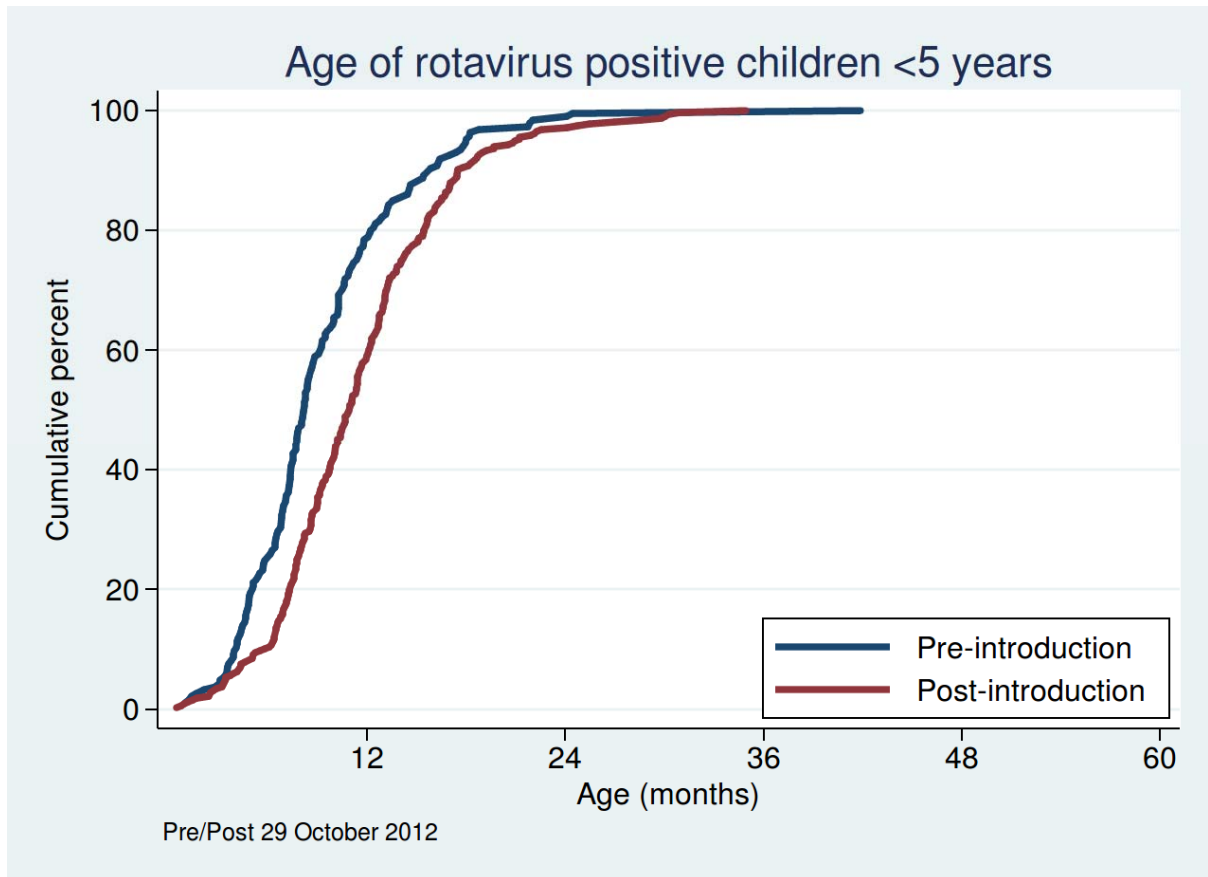

**Web Extra Figure 3. Rotavirus genotypes among children <5 years of age presenting to Queen Elizabeth Central Hospital, Blantyre. Includes pre-rotavirus vaccine period (1 January 2012 to 28 October 2012) and post-rotavirus vaccine period (29 October 2012 to 30 June 2014).**

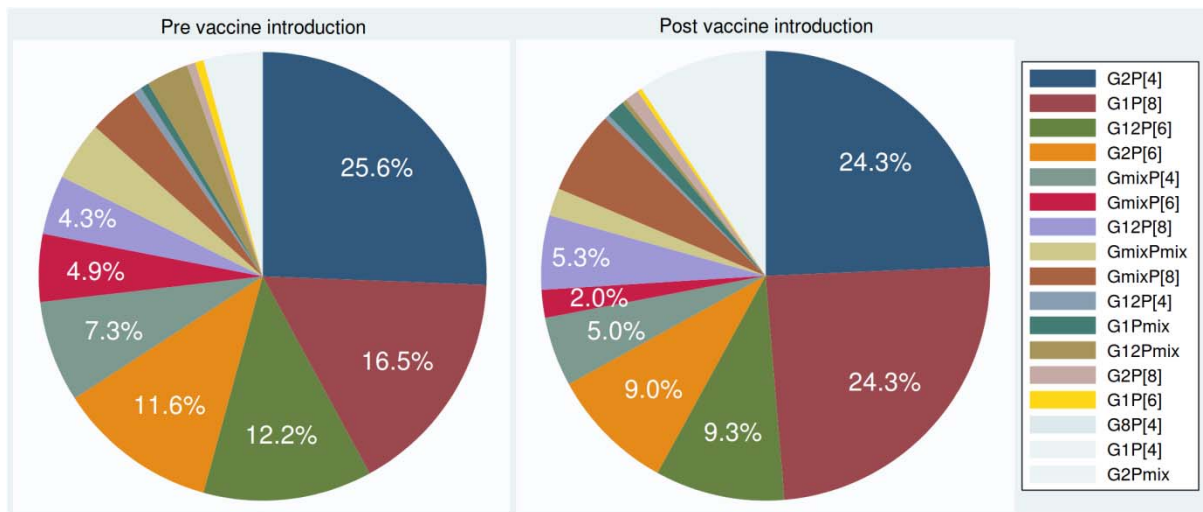

Web Extra Figure 4. Rotavirus hospitalization incidence and vaccination population coverage among infants and children, 1 January 2012 to 30 June 2014.

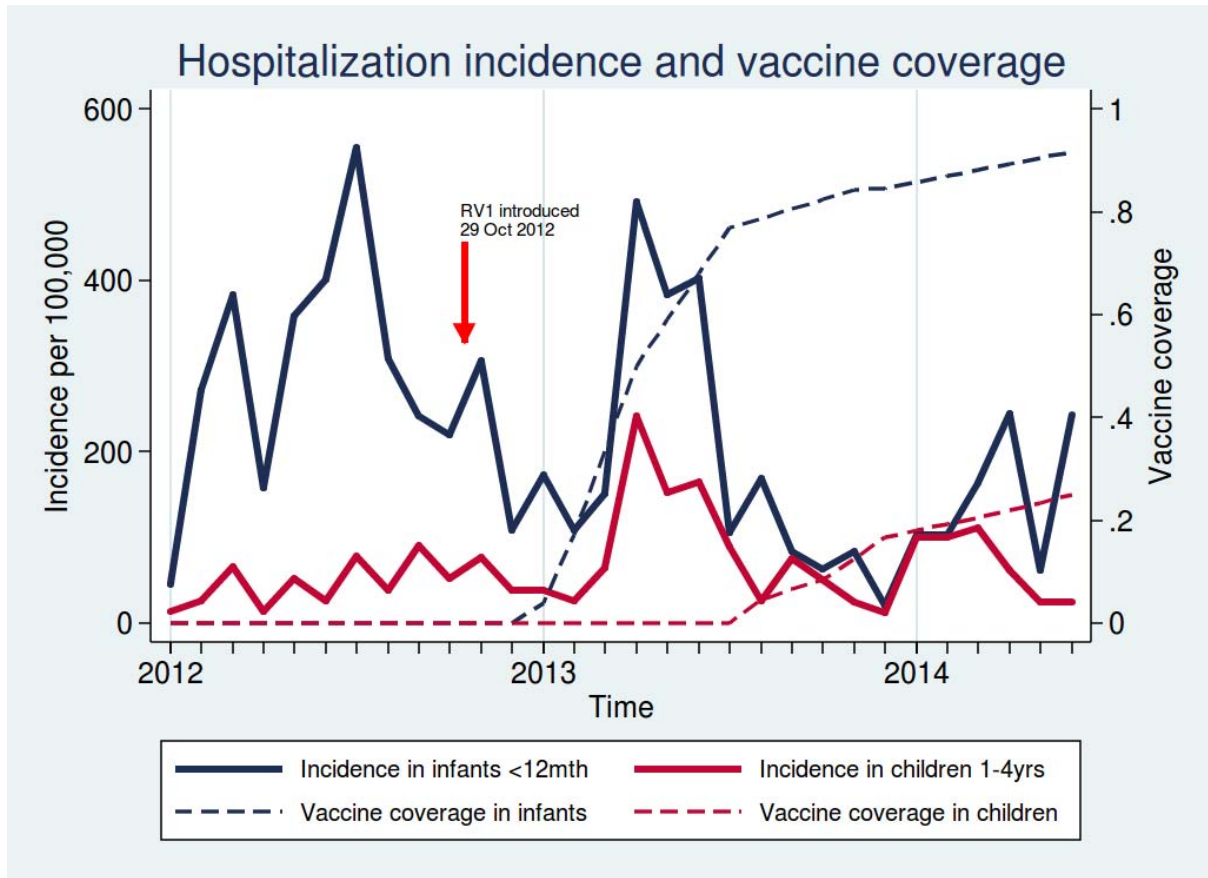



Web Extra Figure 5. Age of rotavirus vaccination among recruited children presenting with diarrhoea to Queen Elizabeth Central Hospital, 1 January 2012 to 30 June 2014. DTP-HBV-HiB vaccine is shown for comparison.

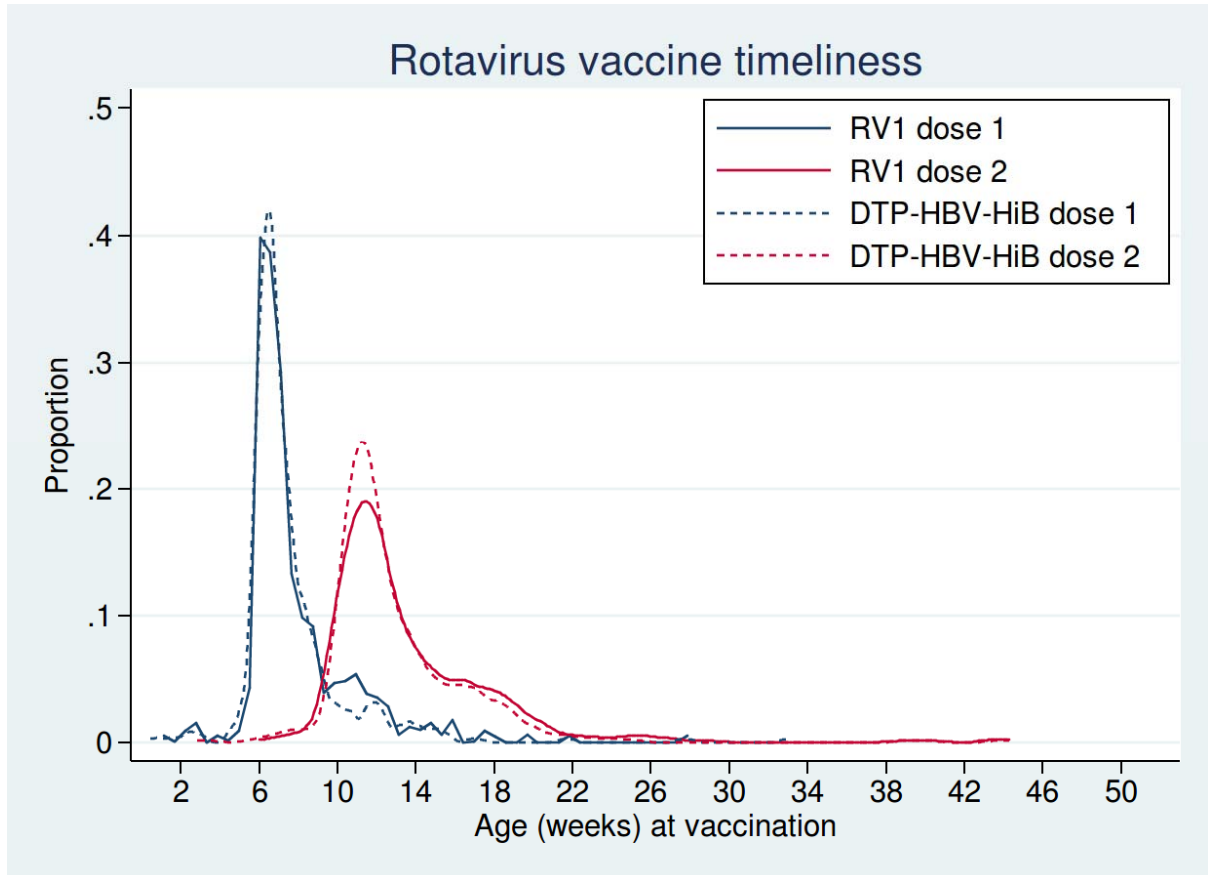

Supplement: mmc1.pdf [file mmc1.pdf]
